# Supplementary material for: Towards High Surface Area α-Al2O3–Mn-Assisted Low Temperature Transformation
Source: MDPI journal article supplement (doi:10.3390/ma16083047), 2023-04-12
Supplement: s1 [file s1]

**Materials**

## **Supporting Information**

### **Towards High Surface Area $\alpha$ -Al<sub>2</sub>O<sub>3</sub>–Mn-Assisted Low Temperature Transformation**

**Tim Jähnichen <sup>1,\*</sup>, Simon Carstens <sup>1</sup>, Maximilian Franz <sup>1</sup>, Otto Laufer <sup>1</sup>, Marianne Wenzel <sup>2</sup>,  
Jörg Matysik <sup>2</sup> and Dirk Enke <sup>1</sup>**

<sup>1</sup> Institute of Chemical Technology, Leipzig University,  
Linnéstr. 3, D-04103 Leipzig, Germany

<sup>2</sup> Institute of Analytical Chemistry, Leipzig University,  
Linnéstr. 3, D-04103 Leipzig, Germany

\* Correspondence: [tim.jaehnichen@uni-leipzig.com](mailto:tim.jaehnichen@uni-leipzig.com)

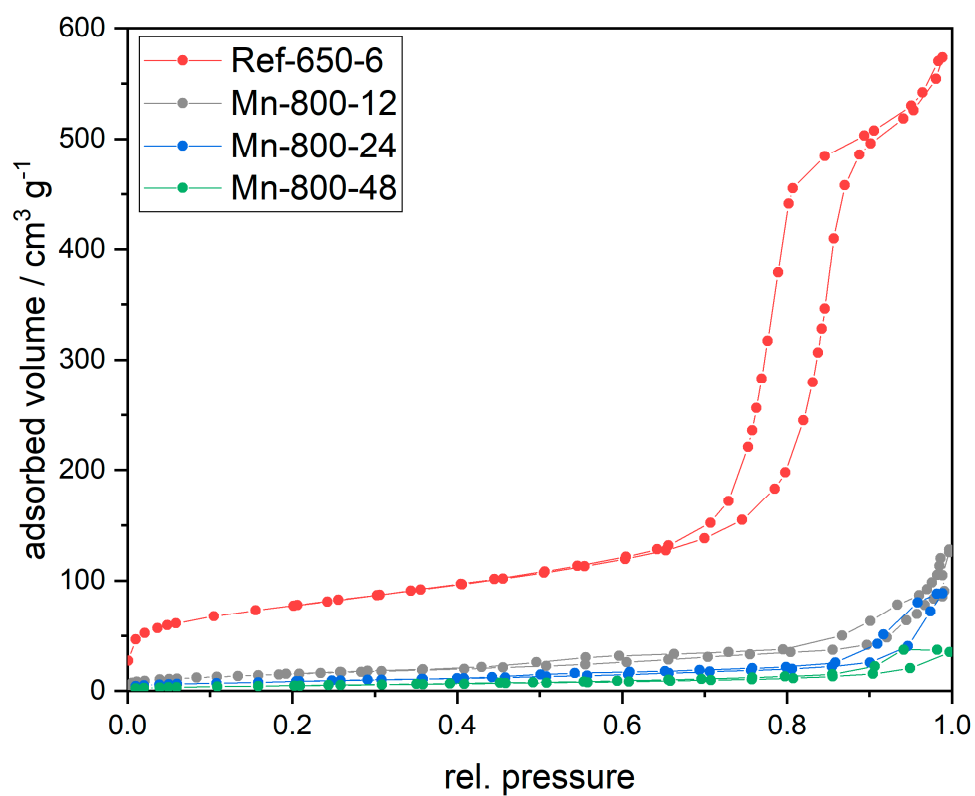

Figure S1. Nitrogen sorption isotherms of the starting material and after calcination at 800 °C for various time periods.

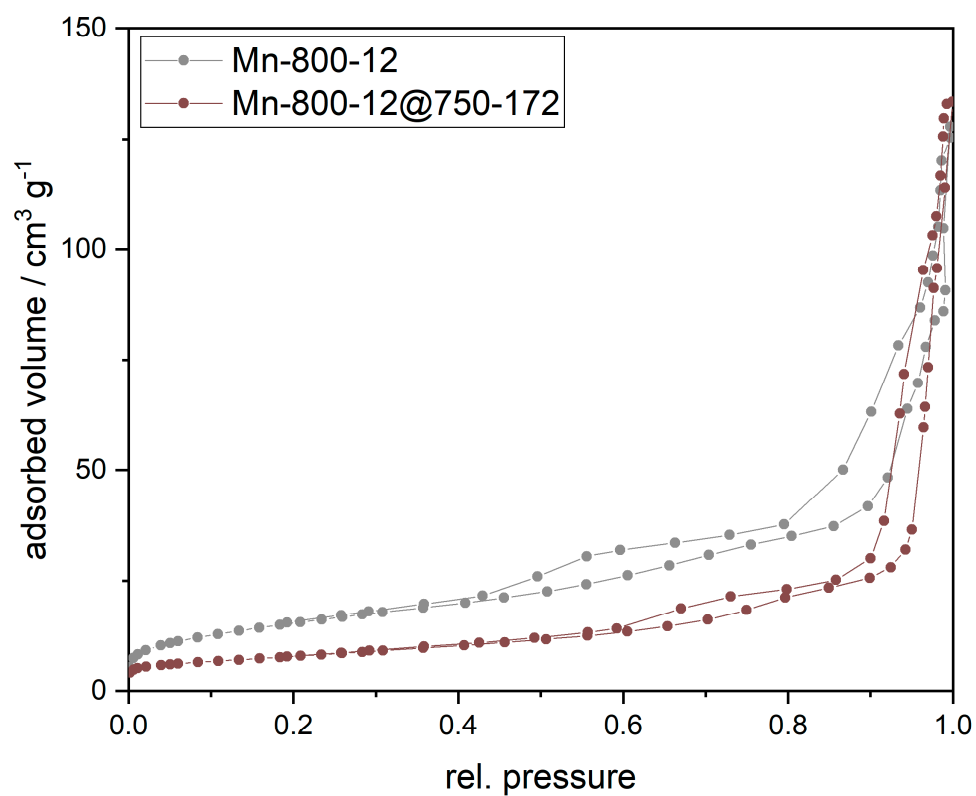

Figure S2. Nitrogen sorption isotherms of Mn-800-12 before and after heat treatment.

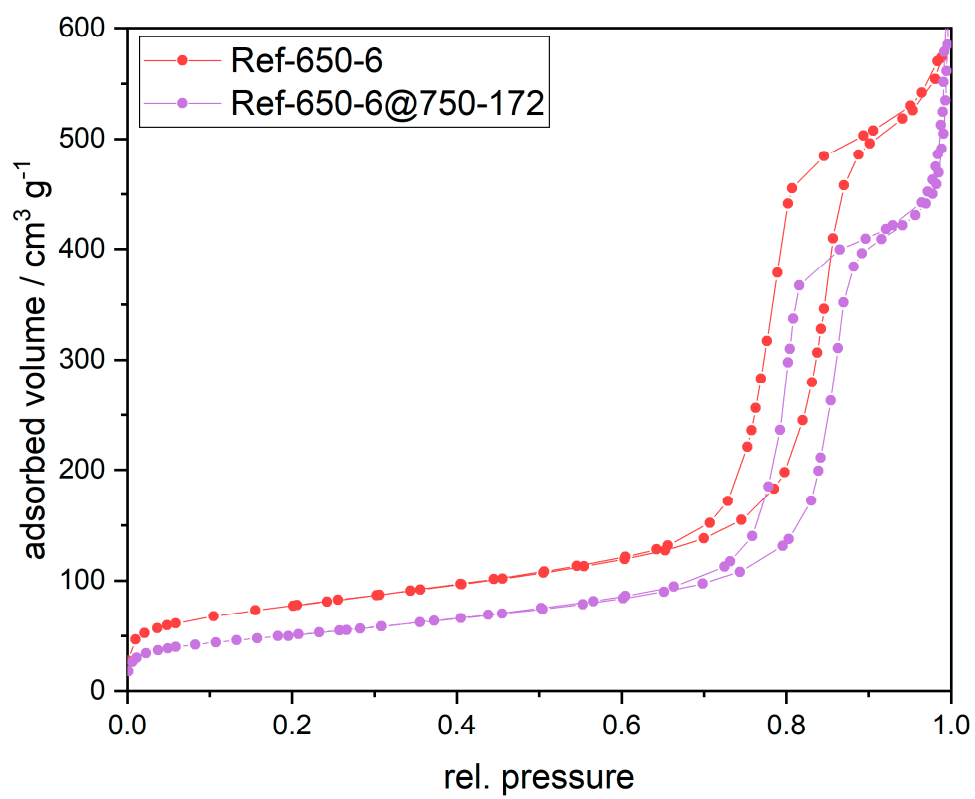

Figure S3. Nitrogen sorption isotherms of Ref-650-6 before and after heat treatment.

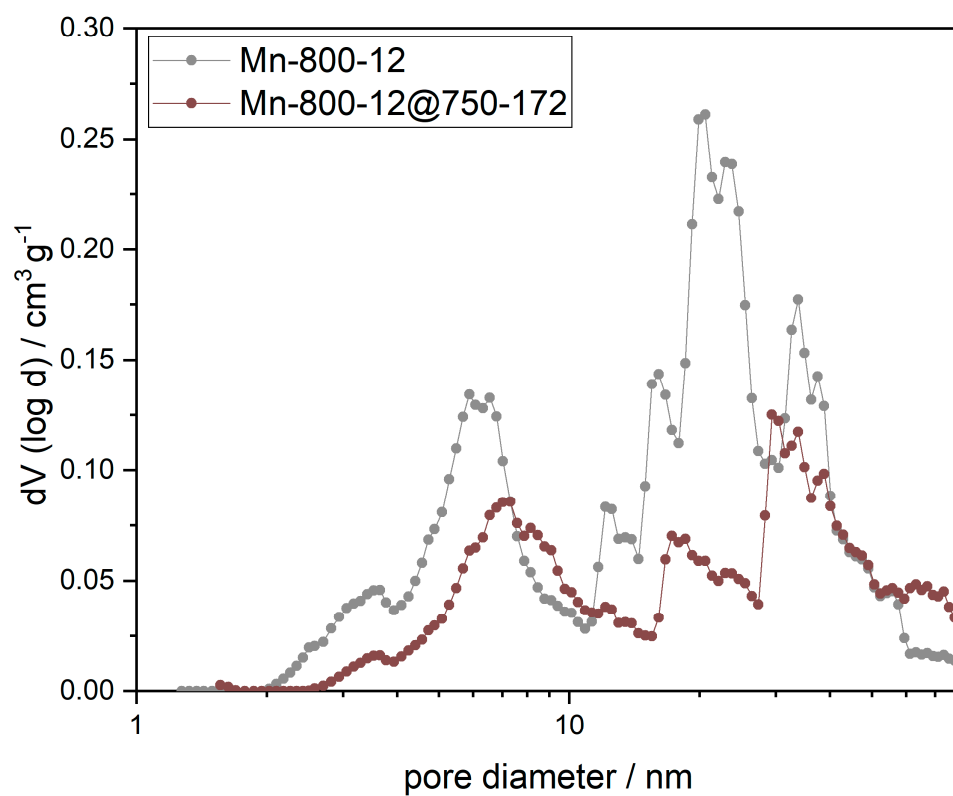

Figure S4. Pore size distribution of Mn-800-12 before and after heat treatment. Calculated from nitrogen sorption.
